# Supplementary material for: The changing epidemiology of dengue in China, 1990-2014: a descriptive analysis of 25 years of nationwide surveillance data
Source: Springer Nature journal article supplement (doi:10.1186/s12916-015-0336-1), 2015-04-28
Supplement: MOESM1 [file 9758826]

**Table S1. The list of variables in the individual dataset of dengue cases from 2005 to 2014.**

| <b>Variables</b>         | <b>Definition/classification</b>                                                                                                                            | <b>Completeness</b> |
|--------------------------|-------------------------------------------------------------------------------------------------------------------------------------------------------------|---------------------|
| ID                       | A unique 8-digital number for each case.                                                                                                                    | 100% reported       |
| Gender                   | Male and Female                                                                                                                                             | 100% reported       |
| Age                      | The interval time from the date of birth to the date of onset                                                                                               | 100% reported       |
| Address                  | The living address (township level) of case when the case was recorded.                                                                                     | 100% reported       |
| Address code             | A unique 8-digital number for each town                                                                                                                     | 100% reported       |
| Type of diagnosis        | Probable case (clinical diagnosed case) and confirmed case (laboratory confirmed case)                                                                      | 100% reported       |
| Serotype                 | DENV-I, II, III and IV (if applicable)                                                                                                                      | 0.8% reported       |
| Hospitalization          | Inpatient or outpatient (Non-mandatory report)                                                                                                              | 30.9% reported      |
| Nationality              | Chinese or foreigner                                                                                                                                        | 100% reported       |
| Type of case             | Indigenous case, or case imported from other country, or case imported from other province in China                                                         | 100% reported       |
| Origin Country           | The country where the case infected with dengue virus or had an exposure history during incubation period.                                                  | 99.4% reported      |
| Origin province of China | For case imported from other province in China, the province where the case infected with dengue virus or had an exposure history during incubation period. | 100% reported       |
| Date of onset            | The date of illness onset                                                                                                                                   | 100% reported       |
| Date of diagnosis        | The date of diagnosis as a probable or confirmed dengue case                                                                                                | 100% reported       |
| Date of report           | The first date of reporting to dengue surveillance system                                                                                                   | 100% reported       |
| Date of Death            | The date of case death, if applicable.                                                                                                                      | 100% reported       |
