# Supplementary material for: The changing epidemiology of dengue in China, 1990-2014: a descriptive analysis of 25 years of nationwide surveillance data
Source: Springer Nature journal article supplement (doi:10.1186/s12916-015-0336-1), 2015-04-28
Supplement: MOESM2 [file 9758826]

**Table S2. Summary of diagnosis criteria and classification for dengue.**

| Variable                     | Guidelines for Diagnosis, Treatment, Prevention and Control for Dengue Fever                                                                                                                                                                                                                                                                                                                                                                                                                                                                                                                                               | Diagnostic Criteria and Principle of Management of Dengue Fever                                                                                                                                                                                                                                                                                                                                                                                                                                                                                                                                                                                   | Diagnostic Criteria for Dengue Fever                                                                                                                                                                                                                                                                                                                                                                                                                                                                                                                                                                                             |
|------------------------------|----------------------------------------------------------------------------------------------------------------------------------------------------------------------------------------------------------------------------------------------------------------------------------------------------------------------------------------------------------------------------------------------------------------------------------------------------------------------------------------------------------------------------------------------------------------------------------------------------------------------------|---------------------------------------------------------------------------------------------------------------------------------------------------------------------------------------------------------------------------------------------------------------------------------------------------------------------------------------------------------------------------------------------------------------------------------------------------------------------------------------------------------------------------------------------------------------------------------------------------------------------------------------------------|----------------------------------------------------------------------------------------------------------------------------------------------------------------------------------------------------------------------------------------------------------------------------------------------------------------------------------------------------------------------------------------------------------------------------------------------------------------------------------------------------------------------------------------------------------------------------------------------------------------------------------|
| <b>Issued by</b>             | Chinese Ministry of Health                                                                                                                                                                                                                                                                                                                                                                                                                                                                                                                                                                                                 | Chinese Ministry of Health                                                                                                                                                                                                                                                                                                                                                                                                                                                                                                                                                                                                                        | Chinese Ministry of Health                                                                                                                                                                                                                                                                                                                                                                                                                                                                                                                                                                                                       |
| <b>Date issued</b>           | 20 June 1988                                                                                                                                                                                                                                                                                                                                                                                                                                                                                                                                                                                                               | 23 November 2001                                                                                                                                                                                                                                                                                                                                                                                                                                                                                                                                                                                                                                  | 28 February 2008                                                                                                                                                                                                                                                                                                                                                                                                                                                                                                                                                                                                                 |
| <b>Date enforced</b>         | 20 June 1988                                                                                                                                                                                                                                                                                                                                                                                                                                                                                                                                                                                                               | 1 May 2002                                                                                                                                                                                                                                                                                                                                                                                                                                                                                                                                                                                                                                        | 1 September 2008                                                                                                                                                                                                                                                                                                                                                                                                                                                                                                                                                                                                                 |
| <b>Epidemiologic linkage</b> | <b>1.1</b> Living in or travel to a dengue endemic country/region or presence at location with ongoing outbreak within previous 15 days of dengue-like illness.                                                                                                                                                                                                                                                                                                                                                                                                                                                            | <b>1.1</b> Living in or travel to a dengue endemic country/region or presence at location with ongoing outbreak within previous 15 days of dengue-like illness, and reported being bitten by mosquito within 5-9 days of illness onset.                                                                                                                                                                                                                                                                                                                                                                                                           | <b>1.1</b> Travel to a dengue endemic country/region within previous 14 days of dengue-like illness<br><b>1.2</b> Around the place of residence or place of work (e.g. 100m radius), there have been dengue case(s) within one month.                                                                                                                                                                                                                                                                                                                                                                                            |
| <b>Clinical description</b>  | <b>2.1 Dengue fever (DF):</b> Sudden onset, chills and fever (39-40°C within 24-36h, a small number of patients showed a biphasic fever). Headache, retro-orbital pain, joint pain, myalgia, arthralgia and lumbago, and a few patients develop abdominal pain. Fatigue and loss of appetite. Flushed skin on face, neck and chest, and conjunctival congestion, superficial lymphadenopathy, and tourniquet test positive. A total white blood cell and platelets counts are normal or decrease. Diversity-rash in limbs and trunk, some patients with bleeding tendency.<br><b>2.2 Dengue hemorrhagic fever (DHF):</b> a | <b>2.1</b> Sudden onset, chills and fever (39-40°C within 24-36h, a small number of patients showed a biphasic fever), with symptoms such as fatigue, nausea and/or vomiting.<br><b>2.2</b> Aches and pains (e.g., headache, retro-orbital pain, joint pain, myalgia, arthralgia).<br><b>2.3</b> Flushed skin on face, neck and chest, and conjunctival congestion.<br><b>2.4</b> Superficial lymphadenopathy.<br><b>2.5</b> Measles-like rash, scarlatiniform rash, and/or petechiae in the limbs, trunk, head and face in the course of illness (days 5-7); itching; no scaling; continued 3-5d.<br><b>2.6</b> Encephalitis, encephalopathy, or | <b>2.1</b> Sudden onset, fever (39-40°C within 24-36h, someone shows biphasic fever); severe headache, retro-orbital pain, myalgia, arthralgia and fatigue; flushed skin on face, neck and chest, and conjunctival congestion, etc.<br><b>2.2</b> Rash: measles-like rash, scarlatiniform rash, and/or needle-like hemorrhagic rash in the limbs, trunk, head and face in the course of illness (days 5-7); itching; no scaling; continued 3-5d.<br><b>2.3</b> Bleeding tendency (tourniquet test positive): petechia, ecchymoses, purpura and injection site bleeding, or bleeding from the mucous membranes of mouth and nose, |

| Variable                | Guidelines for Diagnosis, Treatment, Prevention and Control for Dengue Fever                                                                                                                                                                                                                                                                                                                                                                                                                                                                                                                                                                                                               | Diagnostic Criteria and Principle of Management of Dengue Fever                                                                                                                                                                                                                                                                                                                                                                                              | Diagnostic Criteria for Dengue Fever                                                                                                                                                                                                                                                                                                                                                                                                                                                                            |
|-------------------------|--------------------------------------------------------------------------------------------------------------------------------------------------------------------------------------------------------------------------------------------------------------------------------------------------------------------------------------------------------------------------------------------------------------------------------------------------------------------------------------------------------------------------------------------------------------------------------------------------------------------------------------------------------------------------------------------|--------------------------------------------------------------------------------------------------------------------------------------------------------------------------------------------------------------------------------------------------------------------------------------------------------------------------------------------------------------------------------------------------------------------------------------------------------------|-----------------------------------------------------------------------------------------------------------------------------------------------------------------------------------------------------------------------------------------------------------------------------------------------------------------------------------------------------------------------------------------------------------------------------------------------------------------------------------------------------------------|
|                         | <p>dengue fever case develops the following symptoms: sporadic bleeding points in the limbs, face, armpits, mucous membrane after 2-3 days of illness onset, then become ecchymosis; bleeding of nose and mouth, bleeding in more than one organ of gastrointestinal tract, uterine, vaginal and urinary tract. Liver enlargement. Hematocrit increased more than 20%; Low platelets (&lt; 100,000 cells per mm<sup>3</sup>).</p> <p><b>2.3 Dengue shock syndrome (DSS):</b> a dengue hemorrhagic fever case develops worse condition: clammy skin, restlessness, cyanotic lip, rapid and weak pulse, narrow pulse pressure ≤20mm Hg (2.7kPa) and undetectable in blood pressure, etc.</p> | <p>meningitis-like neurological disorders.</p> <p><b>2.7</b> Bleeding tendency (tourniquet test positive): occurs in the course of illness (days 5-8) with gingival bleeding, nose bleeding, gastrointestinal bleeding, subcutaneous hemorrhage, hematuria, hemoptysis, and vaginal bleeding, and/or chest and abdominal cavity bleeding, etc.</p> <p><b>2.8</b> Multiple organ bleeding.</p> <p><b>2.9</b> Liver enlargement.</p> <p><b>2.10</b> Shock.</p> | <p>gastrointestinal bleeding, hemoptysis, hematuria and vaginal bleeding in the course of illness (days 5-8).</p> <p><b>2.4</b> Massive hemorrhage of gastrointestinal tract, or chest and abdominal cavity bleeding, or intracranial hemorrhage.</p> <p><b>2.5</b> Liver enlargement, pleural or pericardial effusion.</p> <p><b>2.6</b> Shock syndrome: clammy skin, restlessness, rapid and weak pulse and narrow pulse pressure &lt; 20mm Hg (2.7kPa) and undetectable in blood pressure, oliguria etc.</p> |
| <b>Laboratory tests</b> | <p><b>3.1</b> Clinical routine tests of complete blood count, platelet, bleeding and clotting time; for severe cases, test hematocrit, and do additional tests according to the conditions.</p> <p><b>3.2</b> Cell culture isolation of dengue virus (DENV) by <i>Aedes albopictus</i> C6/36 cell, or 1-3 day-old newborn mice, or the larvae of Toxorhynchites.</p>                                                                                                                                                                                                                                                                                                                       | <p><b>3.1</b> Thrombocytopenia (&lt; 100x10<sup>9</sup>/L). White blood cell count decrease, lymphocytes and mononuclear cell count increase.</p> <p><b>3.2</b> Hematocrit increased more than 20%.</p> <p><b>3.3</b> IgG anti-DENV positive in a serum specimen.</p> <p><b>3.4</b> IgM anti-DENV positive in a serum specimen.</p> <p><b>3.5</b> IgG anti-DENV ≥4-fold rise in titer in paired acute and convalescent serum specimens.</p>                  | <p><b>3.1</b> A total white blood cell count decrease.</p> <p><b>3.2</b> Thrombocytopenia (&lt; 100x10<sup>9</sup>/L).</p> <p><b>3.3</b> Hemoconcentration (an increase in hematocrit ≥20% above average for age or a decrease in hematocrit ≥20% of baseline following fluid replacement therapy); hypoproteinemia.</p> <p><b>3.4</b> IgG or IgM anti-DENV positive in a serum</p>                                                                                                                             |

| Variable                            | Guidelines for Diagnosis, Treatment, Prevention and Control for Dengue Fever                                                                                                                                                                                                                                                                                                       | Diagnostic Criteria and Principle of Management of Dengue Fever                                                                                                                                                                                                                                                                                                                                                                                                                                                                                        | Diagnostic Criteria for Dengue Fever                                                                                                                                                                                                                                                                                                                                                                                                                                                                           |
|-------------------------------------|------------------------------------------------------------------------------------------------------------------------------------------------------------------------------------------------------------------------------------------------------------------------------------------------------------------------------------------------------------------------------------|--------------------------------------------------------------------------------------------------------------------------------------------------------------------------------------------------------------------------------------------------------------------------------------------------------------------------------------------------------------------------------------------------------------------------------------------------------------------------------------------------------------------------------------------------------|----------------------------------------------------------------------------------------------------------------------------------------------------------------------------------------------------------------------------------------------------------------------------------------------------------------------------------------------------------------------------------------------------------------------------------------------------------------------------------------------------------------|
|                                     | <p><b>3.3</b> Serologic tests positive: for paired acute and convalescent serum specimens, <math>\geq 4</math>-fold rise in titer by complement fixation (CF), hemagglutination inhibition (HI), or neutralization test (NT); for a single acute phase serum specimen, 1:32 or higher in titer by CF, or 1:1280 or higher in titer by HI, or index <math>\geq 50</math> by NT.</p> | <p>The serologic tests included enzyme-linked immunosorbent assay (ELISA), HI, CF, immunofluorescence method (FA/IFA), Dengue blot (DB), and NT.</p> <p><b>3.6</b> Cell culture isolation of DENV by <i>Aedes albopictus</i> C6/36 cell or 1-3 day-old newborn mice; or detection of DENV nucleic acid by RT-PCR; or detection of antigens by monoclonal antibodies immunofluorescence (mbAb-FIA) in serum, cerebrospinal fluid (within 5 days of illness course), other body fluid or tissue.</p>                                                     | <p>specimen.</p> <p><b>3.5</b> Cell culture isolation of DENV by <i>Aedes albopictus</i> C6/36 cell or 1-3 day-old newborn mice in acute serum, cerebrospinal fluid, blood, or other tissue specimens.</p> <p><b>3.6</b> IgG anti-DENV <math>\geq 4</math>-fold rise in titer in paired acute and convalescent serum samples.</p> <p>The serologic tests included ELISA, mac-ELISA, HI, FA/IFA, NT.</p> <p><b>3.7</b> Detection of DENV nucleic acid by RT-PCR or real-time fluorescence quantitative PCR.</p> |
| <b>Diagnosis and classification</b> | <p><b>4.1 Probable case:</b> a clinically compatible case of DF, DHF, or DSS with an epidemiologic linkage, as defined above.</p> <p><b>4.2 Confirmed case:</b> a probable case with a positive result of dengue virus isolation or serologic tests. The index case(s) of an outbreak or a new affected area should be a confirmed case.</p>                                       | <p><b>4.1 Suspected case:</b> a patient with item 1.1, 2.1 and 2.2, and one of item 2.3 to 2.7, as defined above.</p> <p><b>4.2 Probable case:</b> a suspected case with item 3.1 in a confirmed outbreak, or a suspected case with item 3.1 and 3.3 in an unconfirmed outbreak or presented as a sporadic case.</p> <p><b>4.3 Confirmed case:</b></p> <p><b>DF:</b> a probable case with one of item 3.4, 3.5 and 3.6.</p> <p><b>DHF:</b> a confirmed DF case with item 2.8, 2.9 and 3.2.</p> <p><b>DSS:</b> a confirmed DHF case with item 2.10.</p> | <p><b>4.1 Suspected case:</b> a patient with item 1.1 and 2.1, or a patient with item 2.1, 3.1 and 3.2, as defined above.</p> <p><b>4.2 Probable case:</b></p> <p><b>DF:</b> a suspected case with 1.2, 3.1 and 3.2; or a suspect case with item 2.1, 3.1, 3.2 and 3.4</p> <p><b>DHF:</b> a probable case of DF with item 3.2, 3.3 and one of item 2.3 to 2.5.</p> <p><b>DSS:</b> a probable case of DHF with item 2.6.</p> <p><b>4.3 Confirmed case:</b> a probable case with one of item 3.5 to 3.7.</p>     |
