# Supplementary material for: The changing epidemiology of dengue in China, 1990-2014: a descriptive analysis of 25 years of nationwide surveillance data
Source: Springer Nature journal article supplement (doi:10.1186/s12916-015-0336-1), 2015-04-28
Supplement: MOESM5 [file 9758826]

**Table S4. Demographic and epidemiologic characteristics of dengue cases from 2005 to 2014.**

| Characteristics        | Total (n=55,114) | Imported cases<br>(n=2,061) | Indigenous cases<br>(n=53,053) |
|------------------------|------------------|-----------------------------|--------------------------------|
| <b>Type of cases</b>   |                  |                             |                                |
| Lab-confirmed case     | 41783 (75.8%)    | 1746 (84.7%)                | 40037 (75.5%)                  |
| Probable case          | 13331 (24.2%)    | 315 (15.3%)                 | 13016 (24.5%)                  |
| <b>Gender</b>          |                  |                             |                                |
| Female                 | 27611 (50.1%)    | 687 (33.3%)                 | 26924 (50.7%)                  |
| Male                   | 27503 (49.9%)    | 1374 (66.7%)                | 26129 (49.3%)                  |
| <b>Age</b>             |                  |                             |                                |
| Median (yrs, range)    | 39 (0.01, 107)   | 32 (0.5, 80)                | 39 (0.01, 107)                 |
| <b>Age group</b>       |                  |                             |                                |
| 0-4                    | 988 (1.8%)       | 24 (1.2%)                   | 964 (1.8%)                     |
| 5-14                   | 2814 (5.1%)      | 86 (4.2%)                   | 2728 (5.1%)                    |
| 15-24                  | 8012 (14.5%)     | 347 (16.8%)                 | 7665 (14.4%)                   |
| 25-34                  | 12156 (22.1%)    | 687 (33.3%)                 | 11469 (21.6%)                  |
| 35-44                  | 10089 (18.3%)    | 517 (25.1%)                 | 9572 (18%)                     |
| 45-54                  | 8323 (15.1%)     | 264 (12.8%)                 | 8059 (15.2%)                   |
| 55-64                  | 6614 (12%)       | 103 (5%)                    | 6511 (12.3%)                   |
| 65 and above           | 6118 (11.1%)     | 33 (1.6%)                   | 6085 (11.5%)                   |
| <b>Nationality</b>     |                  |                             |                                |
| Chinese                | 54608 (99.1%)    | 1571 (76.2%)                | 53037 (100%)                   |
| Foreigner              | 506 (0.9%)       | 490 (23.8%)                 | 16 (0.03%)                     |
| <b>Hospitalization</b> |                  |                             |                                |
| Yes                    | 6408 (11.6%)     | 172 (8.3%)                  | 6236 (11.8%)                   |
| No                     | 10611 (19.3%)    | 54 (2.6%)                   | 10557 (19.9%)                  |
| Unknown                | 38095 (69.1%)    | 1835 (89%)                  | 36260 (68.3%)                  |
| <b>Year of onset</b>   |                  |                             |                                |
| 2005                   | 59 (0.1%)        | 59 (2.9%)                   | 0 (0)                          |
| 2006                   | 1063 (1.9%)      | 54 (2.6%)                   | 1009 (1.9%)                    |
| 2007                   | 551 (1%)         | 70 (3.4%)                   | 481 (0.9%)                     |
| 2008                   | 254 (0.5%)       | 167 (8.1%)                  | 87 (0.2%)                      |
| 2009                   | 322 (0.6%)       | 122 (5.9%)                  | 200 (0.4%)                     |
| 2010                   | 260 (0.5%)       | 147 (7.1%)                  | 113 (0.2%)                     |
| 2011                   | 160 (0.3%)       | 124 (6%)                    | 36 (0.1%)                      |
| 2012                   | 610 (1.1%)       | 168 (8.2%)                  | 442 (0.8%)                     |
| 2013                   | 4779 (8.7%)      | 491 (23.8%)                 | 4288 (8.1%)                    |
| 2014                   | 47056 (85.4%)    | 659 (32%)                   | 46397 (87.5%)                  |
| <b>Month of onset</b>  |                  |                             |                                |
| January                | 44 (0.1%)        | 44 (2.1%)                   | 0 (0)                          |
| February               | 50 (0.1%)        | 50 (2.4%)                   | 0 (0)                          |

|                                            |                |                |                |
|--------------------------------------------|----------------|----------------|----------------|
| March                                      | 61 (0.1%)      | 61 (3%)        | 0 (0)          |
| April                                      | 73 (0.1%)      | 72 (3.5%)      | 1 (0.002%)     |
| May                                        | 110 (0.2%)     | 110 (5.3%)     | 0 (0)          |
| June                                       | 135 (0.2%)     | 113 (5.5%)     | 22 (0%)        |
| July                                       | 584 (1.1%)     | 158 (7.7%)     | 426 (0.8%)     |
| August                                     | 3363 (6.1%)    | 290 (14.1%)    | 3073 (5.8%)    |
| September                                  | 21824 (39.6%)  | 399 (19.4%)    | 21425 (40.4%)  |
| October                                    | 26278 (47.7%)  | 507 (24.6%)    | 25771 (48.6%)  |
| November                                   | 2434 (4.4%)    | 182 (8.8%)     | 2252 (4.2%)    |
| December                                   | 158 (0.3%)     | 75 (3.6%)      | 83 (0.2%)      |
| Median of time delay (days, range)         |                |                |                |
| From illness onset to diagnosis            | 5 (0, 196)     | 6 (0, 196)     | 5 (0, 141)     |
| From diagnosis to report <sup>a</sup>      | 0.3 (-196, 31) | 0.2 (-196, 31) | 0.3 (-122, 15) |
| From illness onset to report               | 6 (0.3, 82)    | 6 (0.3, 82)    | 6 (0.3, 64)    |
| Serotype of Dengue virus                   |                |                |                |
| I                                          | 373 (0.7%)     | 11 (0.5%)      | 362 (0.7%)     |
| II                                         | 42 (0.1%)      | 2 (0.1%)       | 40 (0.1%)      |
| III                                        | 16 (0.03%)     | 3 (0.1%)       | 13 (0.02%)     |
| IV                                         | 2 (0.004%)     | 2 (0.1%)       | 0 (0)          |
| Unknown                                    | 54681 (99.2%)  | 2043 (99.1%)   | 52638 (99.2%)  |
| Case imported from other province in China |                |                |                |
| Yes                                        | 235 (0.4%)     | 235 (11.4%)    | 0 (0)          |
| No                                         | 54879 (99.6%)  | 1826 (88.6%)   | 53053 (100%)   |

Note: Data are presented as no. (%) of patients unless otherwise indicated. <sup>a</sup> The negative number of the median from diagnosis to report means that case was reported by physician as a suspected dengue patient to the surveillance system before diagnosed as a probable or laboratory confirmed dengue cases.
