# Supplementary material for: The changing epidemiology of dengue in China, 1990-2014: a descriptive analysis of 25 years of nationwide surveillance data
Source: Springer Nature journal article supplement (doi:10.1186/s12916-015-0336-1), 2015-04-28
Supplement: MOESM6 [file 9758826]

**Table S5. Demographic and epidemiologic characteristics of imported dengue cases by year from 2005 to 2014.**

| Characteristics                           | Total (n=2061) | 2005-2013 (n=1402) | 2014 (n=659) |
|-------------------------------------------|----------------|--------------------|--------------|
| <b>Type of cases</b>                      |                |                    |              |
| Lab-confirmed case                        | 1746 (84.7%)   | 1177 (84%)         | 569 (86.3%)  |
| Probable case                             | 315 (15.3%)    | 225 (16%)          | 90 (13.7%)   |
| <b>Gender</b>                             |                |                    |              |
| Female                                    | 687 (33.3%)    | 452 (32.2%)        | 235 (35.7%)  |
| Male                                      | 1374 (66.7%)   | 950 (67.8%)        | 424 (64.3%)  |
| <b>Age</b>                                |                |                    |              |
| Median (yrs, range)                       | 32 (0.5, 80)   | 32 (0.6, 80)       | 33 (0.5, 76) |
| <b>Age group</b>                          |                |                    |              |
| 0-4                                       | 24 (1.2%)      | 14 (1%)            | 10 (1.5%)    |
| 5-14                                      | 86 (4.2%)      | 48 (3.4%)          | 38 (5.8%)    |
| 15-24                                     | 347 (16.8%)    | 252 (18%)          | 95 (14.4%)   |
| 25-34                                     | 687 (33.3%)    | 478 (34.1%)        | 209 (31.7%)  |
| 35-44                                     | 517 (25.1%)    | 363 (25.9%)        | 154 (23.4%)  |
| 45-54                                     | 264 (12.8%)    | 160 (11.4%)        | 104 (15.8%)  |
| 55-64                                     | 103 (5%)       | 68 (4.9%)          | 35 (5.3%)    |
| 65 and above                              | 33 (1.6%)      | 19 (1.4%)          | 14 (2.1%)    |
| <b>Nationality</b>                        |                |                    |              |
| Chinese                                   | 1571 (76.2%)   | 1066 (76%)         | 505 (76.6%)  |
| Foreigner                                 | 490 (23.8%)    | 336 (24%)          | 154 (23.4%)  |
| <b>Hospitalization</b>                    |                |                    |              |
| Yes                                       | 172 (8.3%)     | 116 (8.3%)         | 56 (8.5%)    |
| No                                        | 54 (2.6%)      | 19 (1.4%)          | 35 (5.3%)    |
| Unknown                                   | 1835 (89%)     | 1267 (90.4%)       | 568 (86.2%)  |
| <b>Month of onset</b>                     |                |                    |              |
| January                                   | 44 (2.1%)      | 28 (2%)            | 16 (2.4%)    |
| February                                  | 50 (2.4%)      | 40 (2.9%)          | 10 (1.5%)    |
| March                                     | 61 (3%)        | 44 (3.1%)          | 17 (2.6%)    |
| April                                     | 72 (3.5%)      | 63 (4.5%)          | 9 (1.4%)     |
| May                                       | 110 (5.3%)     | 82 (5.8%)          | 28 (4.2%)    |
| June                                      | 113 (5.5%)     | 82 (5.8%)          | 31 (4.7%)    |
| July                                      | 158 (7.7%)     | 131 (9.3%)         | 27 (4.1%)    |
| August                                    | 290 (14.1%)    | 243 (17.3%)        | 47 (7.1%)    |
| September                                 | 399 (19.4%)    | 259 (18.5%)        | 140 (21.2%)  |
| October                                   | 507 (24.6%)    | 262 (18.7%)        | 245 (37.2%)  |
| November                                  | 182 (8.8%)     | 117 (8.3%)         | 65 (9.9%)    |
| December                                  | 75 (3.6%)      | 51 (3.6%)          | 24 (3.6%)    |
| <b>Median of time delay (days, range)</b> |                |                    |              |

|                                            |                |                |               |
|--------------------------------------------|----------------|----------------|---------------|
| From illness onset to diagnosis            | 6 (0, 196)     | 6 (0, 196)     | 5 (0.3, 140)  |
| From diagnosis to report <sup>a</sup>      | 0.2 (-196, 31) | 0.3 (-196, 31) | 0.1 (-137, 1) |
| From illness onset to report               | 6 (0.3, 82)    | 6 (0.4, 82)    | 5 (0.3, 48)   |
| Serotype of Dengue virus                   |                |                |               |
| I                                          | 11 (0.5%)      | 9 (0.6%)       | 2 (0.3%)      |
| II                                         | 2 (0.1%)       | 1 (0.1%)       | 1 (0.2%)      |
| III                                        | 3 (0.1%)       | 3 (0.2%)       | 0 (0)         |
| IV                                         | 2 (0.1%)       | 2 (0.1%)       | 0 (0)         |
| Unknown                                    | 2008 (99.1%)   | 1387 (98.9%)   | 621 (99.5%)   |
| Case imported from other province in China |                |                |               |
| Yes                                        | 235 (11.4%)    | 8 (0.6%)       | 227 (34.4%)   |
| No                                         | 1826 (88.6%)   | 1394 (99.4%)   | 432 (65.6%)   |

Note: Data are presented as no. (%) of patients unless otherwise indicated. <sup>a</sup> The negative number of the median from diagnosis to report means that case was reported by physician as a suspected dengue patient to the surveillance system before diagnosed as a probable or laboratory confirmed dengue cases.
