# Supplementary material for: The changing epidemiology of dengue in China, 1990-2014: a descriptive analysis of 25 years of nationwide surveillance data
Source: Springer Nature journal article supplement (doi:10.1186/s12916-015-0336-1), 2015-04-28
Supplement: MOESM7 [file 9758826]

**Table S6. Demographic and epidemiologic characteristics of indigenous dengue cases by year from 2005 to 2014.**

| Characteristics                           | Total (n=53053) | 2005-2013 (n=6656) | 2014 (n=46,397) |
|-------------------------------------------|-----------------|--------------------|-----------------|
| <b>Type of cases</b>                      |                 |                    |                 |
| Lab-confirmed case                        | 40037 (75.4%)   | 5466 (82.1%)       | 34571 (74.5%)   |
| Probable case                             | 13016 (24.6%)   | 1190 (17.9%)       | 11826 (25.5%)   |
| <b>Gender</b>                             |                 |                    |                 |
| Female                                    | 26924 (50.7%)   | 3505 (52.7%)       | 23419 (50.5%)   |
| Male                                      | 26129 (49.3%)   | 3151 (47.3%)       | 22978 (49.5%)   |
| <b>Age</b>                                |                 |                    |                 |
| Median (yrs, range)                       | 39 (0.01, 107)  | 38 (0.2, 96)       | 39 (0.01, 107)  |
| <b>Age group</b>                          |                 |                    |                 |
| 0-4                                       | 964 (1.8%)      | 56 (0.8%)          | 908 (2%)        |
| 5-14                                      | 2728 (5.1%)     | 396 (5.9%)         | 2332 (5%)       |
| 15-24                                     | 7665 (14.4%)    | 1115 (16.8%)       | 6550 (14.1%)    |
| 25-34                                     | 11469 (21.6%)   | 1399 (21%)         | 10070 (21.7%)   |
| 35-44                                     | 9572 (18%)      | 1288 (19.4%)       | 8284 (17.9%)    |
| 45-54                                     | 8059 (15.2%)    | 1052 (15.8%)       | 7007 (15.1%)    |
| 55-64                                     | 6511 (12.3%)    | 770 (11.6%)        | 5741 (12.4%)    |
| 65 and above                              | 6085 (11.5%)    | 580 (8.7%)         | 5505 (11.9%)    |
| <b>Nationality</b>                        |                 |                    |                 |
| Chinese                                   | 53037 (100%)    | 6656 (100%)        | 46381 (100%)    |
| Foreigner                                 | 16 (0%)         | 0 (0)              | 16 (0%)         |
| <b>Hospitalization</b>                    |                 |                    |                 |
| Yes                                       | 6202 (11.7%)    | 749 (11.3%)        | 5453 (11.8%)    |
| No                                        | 10537 (19.9%)   | 155 (2.3%)         | 10382 (22.4%)   |
| Unknown                                   | 36164 (68.4%)   | 5752 (86.4%)       | 30412 (65.8%)   |
| <b>Month of onset</b>                     |                 |                    |                 |
| January                                   | 0 (0)           | 0 (0)              | 0 (0)           |
| February                                  | 0 (0)           | 0 (0)              | 0 (0)           |
| March                                     | 0 (0)           | 0 (0)              | 0 (0)           |
| April                                     | 1 (0.002%)      | 1 (0.02%)          | 0 (0)           |
| May                                       | 0 (0)           | 0 (0)              | 0 (0)           |
| June                                      | 22 (0.04%)      | 4 (0.1%)           | 18 (0.04%)      |
| July                                      | 426 (0.8%)      | 170 (2.6%)         | 256 (0.6%)      |
| August                                    | 3073 (5.8%)     | 1161 (17.4%)       | 1912 (4.1%)     |
| September                                 | 21425 (40.4%)   | 2333 (35.1%)       | 19092 (41.1%)   |
| October                                   | 25771 (48.6%)   | 2431 (36.5%)       | 23340 (50.3%)   |
| November                                  | 2252 (4.2%)     | 552 (8.3%)         | 1700 (3.7%)     |
| December                                  | 83 (0.2%)       | 4 (0.1%)           | 79 (0.2%)       |
| <b>Median of time delay (days, range)</b> |                 |                    |                 |

|                                       |                |                |               |
|---------------------------------------|----------------|----------------|---------------|
| From illness onset to diagnosis       | 5 (0, 141)     | 6 (0, 141)     | 5 (0, 95)     |
| From diagnosis to report <sup>a</sup> | 0.3 (-122, 15) | 0.1 (-122, 15) | 0.3 (-84, 8)  |
| From illness onset to report          | 6 (0.3, 64)    | 6 (0.4, 62)    | 5 (0.3, 64)   |
| Serotype of Dengue virus              |                |                |               |
| I                                     | 362 (0.7%)     | 61 (0.9%)      | 301 (0.6%)    |
| II                                    | 40 (0.1%)      | 1 (0%)         | 39 (0.1%)     |
| III                                   | 13 (0.02%)     | 13 (0.2%)      | 0 (0)         |
| Unknown                               | 52638 (99.2%)  | 6581 (98.9%)   | 46057 (99.3%) |

Note: Data are presented as no. (%) of patients unless otherwise indicated. <sup>a</sup> The negative number of the median from diagnosis to report means that case was reported by physician as a suspected dengue patient to the surveillance system before diagnosed as a probable or laboratory confirmed dengue cases.
